# Supplementary material for: Seasonal Azithromycin Use in Paediatric Protracted Bacterial Bronchitis Does Not Promote Antimicrobial Resistance but Does Modulate the Nasopharyngeal Microbiome
Source: MDPI journal article supplement (doi:10.3390/ijms242216053), 2023-11-07
Supplement: s1 [file s1]

## Supplementary Appendix

**Table S1.** Breakdown of acute courses of antibiotics prescribed for presumed respiratory tract infections during the study

|                    | Number of antibiotic courses prescribed during the study |             |              |                |               |
|--------------------|----------------------------------------------------------|-------------|--------------|----------------|---------------|
|                    | Co-amoxiclav (> 2 weeks duration)                        | Amoxicillin | Azithromycin | Clarithromycin | Total courses |
| Azithromycin group | 17                                                       | 14          | 2            | 0              | 33            |
| Comparison group   | 28                                                       | 21          | 3            | 2              | 54            |

**Table S2.** Number of bacteria species cultured from nasopharyngeal swabs in each group at each swab collection timepoint

| Number of bacteria species cultured per swab | Timing of swab in the comparison group (m = months)   |    |    |     |             |                |                 |                 |                             |
|----------------------------------------------|-------------------------------------------------------|----|----|-----|-------------|----------------|-----------------|-----------------|-----------------------------|
|                                              | Baseline                                              | 3m | 6m | 9m  | Final 1 12m | Baseline 2 12m | 4m <sup>†</sup> | 8m <sup>†</sup> | Final 2 <sup>†</sup> 12-20m |
| 0                                            | 4                                                     | 5  | 1  | 3   | 3           | 2              | 3               | 4               | 7                           |
| 1                                            | 3                                                     | 3  | 7  | 3   | 5           | 5              | 4               | 3               | 4                           |
| 2                                            | 3                                                     | 2  | 1  | 4   | 2           | 5              | 2               | 1               | 2                           |
| 3                                            | 0                                                     | 0  | 1  | 0   | 0           | 3              | 1               | 0               | 1                           |
| No swab collected                            | 0                                                     | 0  | 0  | 0   | 0           | 0              | 5               | 7*              | 1*                          |
| A) Comparison group                          |                                                       |    |    |     |             |                |                 |                 |                             |
| Number of bacteria species cultured per swab | Timing of swab in the azithromycin group (m = months) |    |    |     |             |                |                 |                 |                             |
|                                              | Baseline                                              | 3m | 6m | 9m  | Final 1 12m | Baseline 2 12m | 4m <sup>†</sup> | 8m <sup>†</sup> | Final 2 <sup>†</sup> 12-20m |
| 0                                            | 4                                                     | 6  | 5  | 3   | 4           | 5              | 5               | 5               | 10                          |
| 1                                            | 4                                                     | 1  | 2  | 2   | 1           | 5              | 1               | 2               | 3                           |
| 2                                            | 2                                                     | 1  | 2  | 1   | 2           | 5              | 1               | 2               | 1                           |
| 3                                            | 0                                                     | 0  | 0  | 1   | 0           | 0              | 0               | 0               | 0                           |
| No swab collected                            | 0                                                     | 1* | 1  | 3** | 3**         | 0              | 8*              | 6*              | 1*                          |
| B) Azithromycin group                        |                                                       |    |    |     |             |                |                 |                 |                             |

\* Time swab was taken after Baseline 2 swab collected: m - months

\*One participant left the study, the remaining did not get a swab collected due to COVID-19 restrictions  
 \*\* Two participants left the study, the remaining did not get a swab collected due to COVID-19 restrictions.

**Figure S1.** MIC distributions of *M. catarrhalis* and *S. aureus* isolates

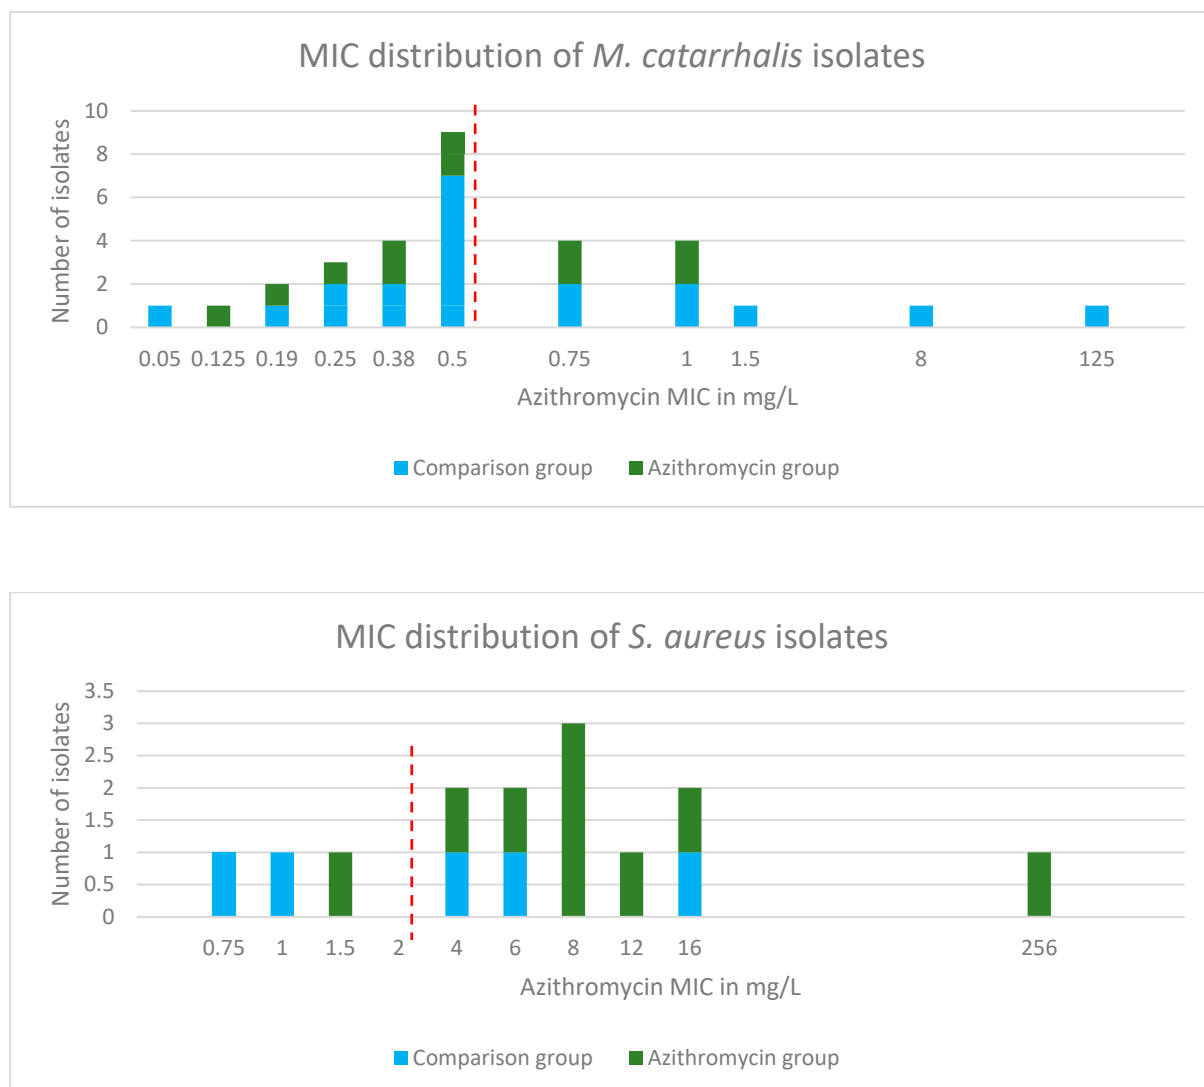

Azithromycin susceptibility was tested using an agar-gradient diffusion method, E-test strips. Susceptibility was determined using the EUCAST break points for each isolate; *M. catarrhalis*, *H. influenzae*. Dashed red lines indicate EUCAST breakpoints [27].

**Table S3.** Repeat parallel susceptibility testing of a subset of *S. pneumoniae* isolates

| Sample | *AZM<br>MIC mg/L<br>(first E-<br>test strip) | Erythromycin<br>Disc<br>diffusion in<br>mm (first) | *AZM<br>MIC mg/L<br>(2 <sup>nd</sup> E-test<br>strip) | Erythromycin<br>Disc diffusion in<br>mm<br>(2 <sup>nd</sup> ) | Erythromycin MIC<br>Resistant > 0.5mg/L<br>(E-test strip) |
|--------|----------------------------------------------|----------------------------------------------------|-------------------------------------------------------|---------------------------------------------------------------|-----------------------------------------------------------|
|--------|----------------------------------------------|----------------------------------------------------|-------------------------------------------------------|---------------------------------------------------------------|-----------------------------------------------------------|

|   |      |    |      |    |       |
|---|------|----|------|----|-------|
| 1 | 1    | 31 | 1    | 31 | 0.25  |
| 2 | 1.5  | 31 | 1.5  | 31 | 0.19  |
| 3 | 2    | 29 | 2    | 29 | 0.125 |
| 4 | 0.75 | 30 | 0.75 | 30 | 0.25  |
| 5 | 2    | 29 | 2    | 29 | 0.25  |

*EUCAST breakpoints for S. pneumoniae: Azithromycin resistance, MIC > 2mg/L, Erythromycin resistance, MIC >0.5mg/L. Erythromycin resistance, < 19mm*

**Table S4.** Quality assessment of the *S. pneumoniae* genome assemblies provided by 'MicrobesNG'

|                                    | Median (25 <sup>th</sup> -75 <sup>th</sup> quartiles) |
|------------------------------------|-------------------------------------------------------|
| Number of contigs                  | 29 (24 – 44)                                          |
| Largest contig                     | 374452 (322588 – 434645)                              |
| Total length                       | 2087469 (2051440 – 2119495)                           |
| GC(%)                              | 39.57 (39.54 – 39.62)                                 |
| Mean Coverage (Standard deviation) | 80.34 (20.4)                                          |

*A summary of the quality assurance of the 37 sequenced S. pneumoniae genomes. Descriptive analysis of sequencing showed the mean total length and GC(%) coverage to be consistent with that found in S. pneumoniae genomes.*

**Figure S2.** Sample processing pathway. A flow chart showing the number of samples initially processed and the number removed during the quality control process

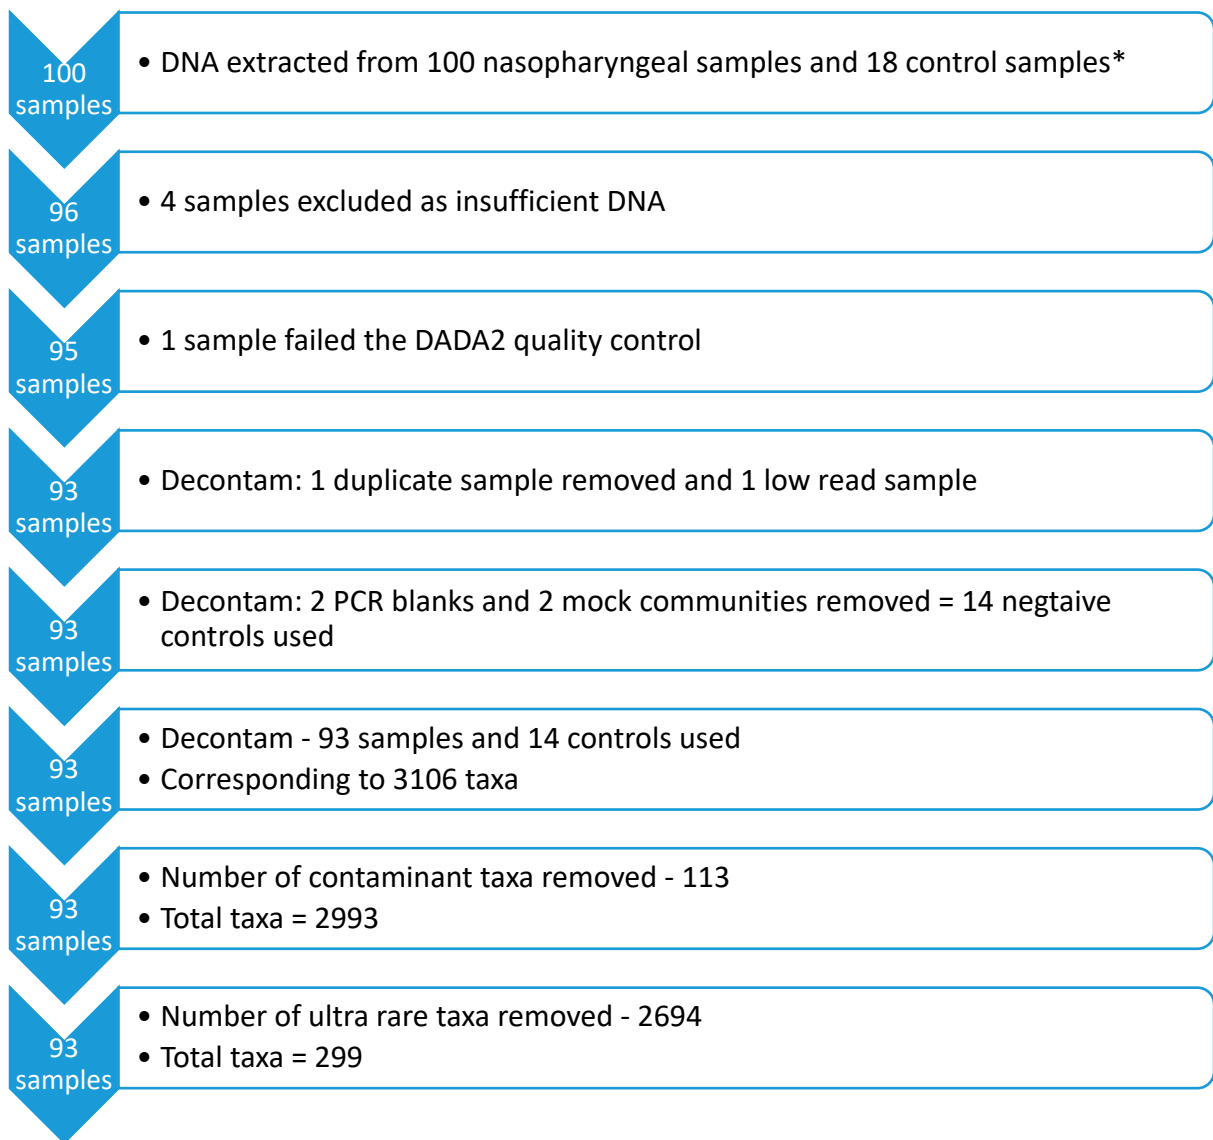

*\*2 positive mock community samples and 16 negative controls (2 PCR blanks, 4 transport medium samples and 10 ISO\_blanks containing reagents)*

**Figure S3.** Non-metric multi-dimensional scaling of beta diversity for DNPS collected from children in both comparison and azithromycin group

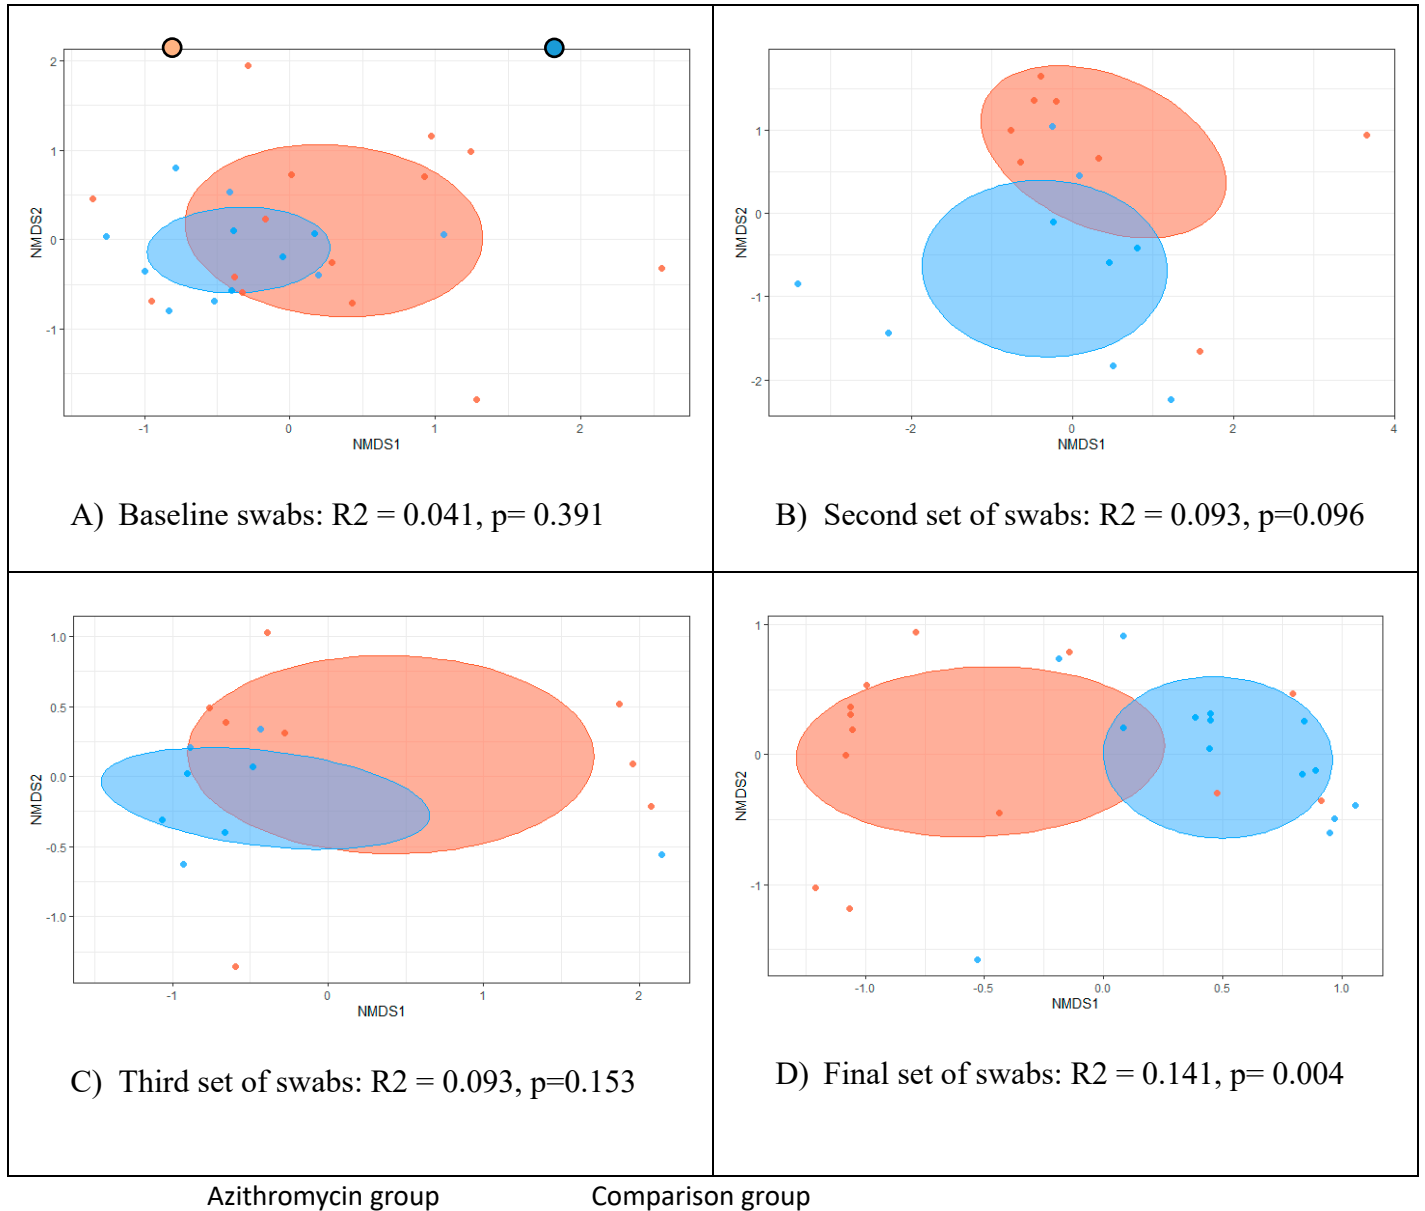

Beta diversity has been calculated using the Bray-Curtis dissimilarity measure and plotted using Non-Metric Multidimensional Scaling (NMDS). Coloured plots indicate samples taken from participants either in the comparison (blue) or azithromycin group (orange). A-D show swabs taken at different time points over the study period. Significant dissimilarity was only found between the 2 groups in the final set of swabs taken.

**Figure S4.** Non-metric multi-dimensional scaling of beta diversity: Those actively taking azithromycin at the time of swab collection compared to the comparison group.

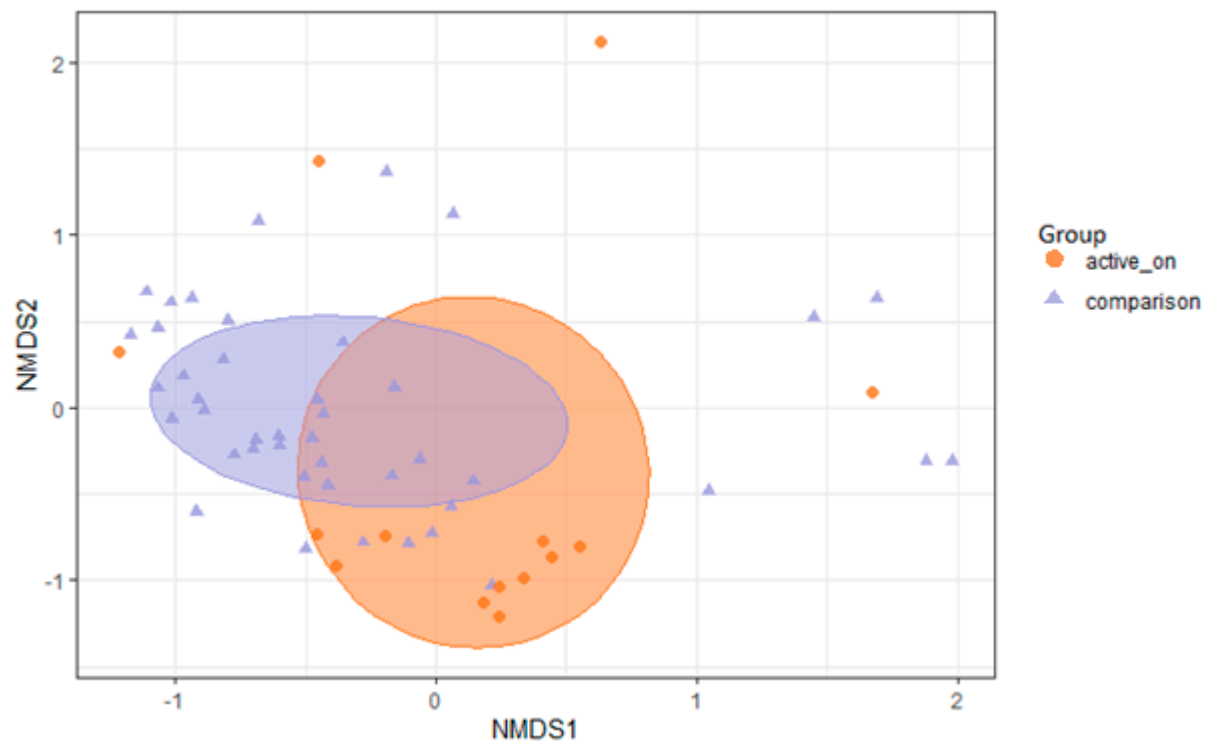

Beta diversity has been calculated using the Bray-Curtis dissimilarity measure and plotted using Non-Metric Multidimensional Scaling (NMDS). Coloured plots indicate samples taken from participants in the azithromycin group, actively taking azithromycin at the time of swab collection, compared to those in the comparison group. Azithromycin treatment had a significant effect on the microbiota composition when those actively taking azithromycin at the time of swab collection were compared only to those individuals in the comparison group. PERMANOVA;  $R=0.079$ ,  $p=0.001$

**Figure S5.** The microbial composition of nasopharyngeal swabs collected from those in the comparison group

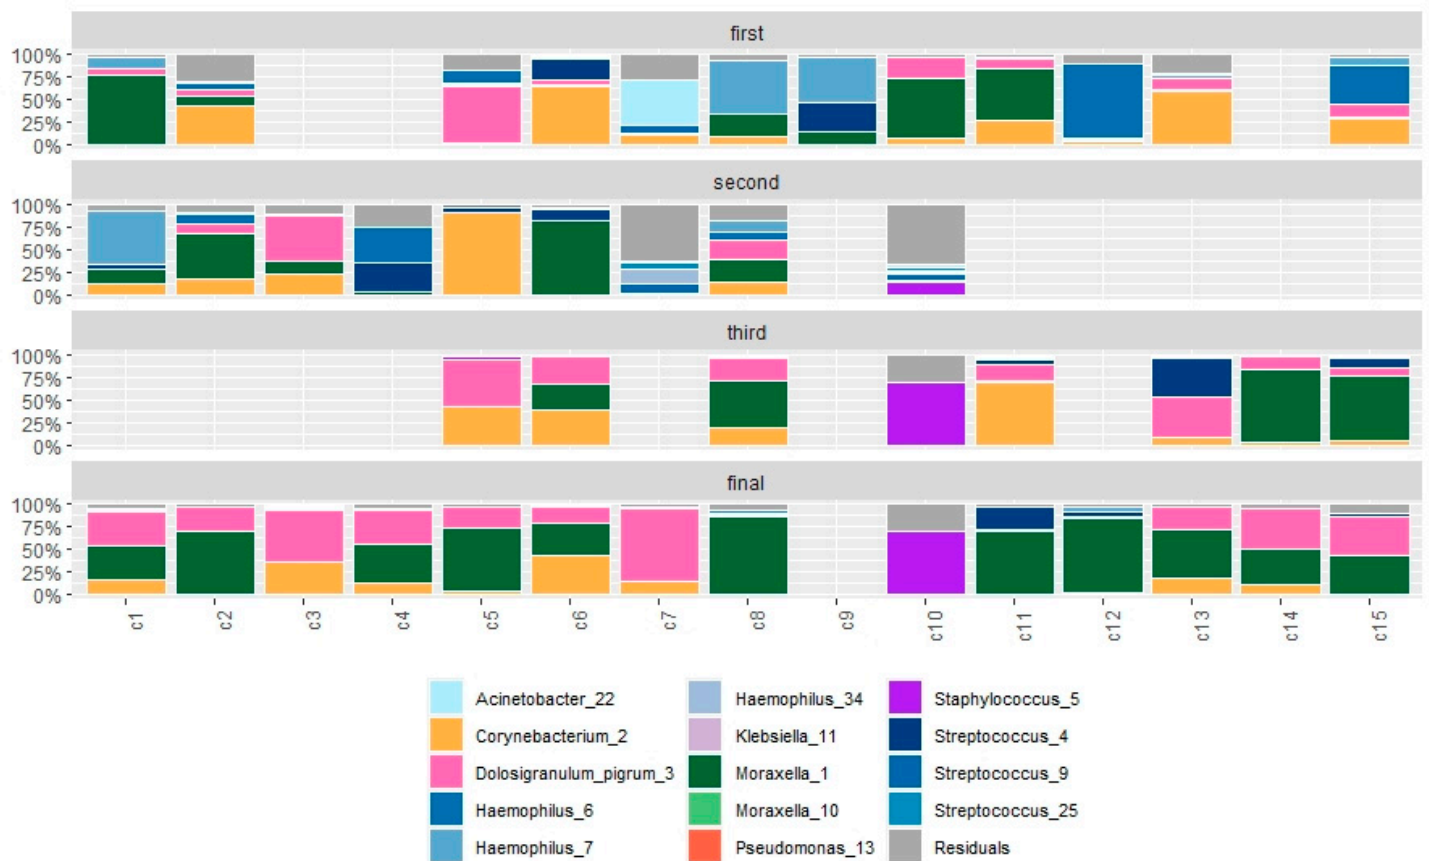

The microbial composition of the top 15 most abundant taxa in the nasopharyngeal swabs collected from children in the comparison group. Baseline swabs are denoted by “first”. The 3 subsequent swabs taken over the study period are presented underneath in columns for each participant. Blank cells are present as some swabs were unable to be collected during the COVID-19 pandemic and 3 baseline swabs did not pass the quality control for 16S rRNA analysis. The naming system of the amplicon sequence variants (ASVs) indicates firstly the genus or species if identified. The numerical value following the taxonomy level reports how abundant that particular genus/species was across all the study samples.

A) The microbial composition of nasopharyngeal swabs collected from those in the azithromycin group

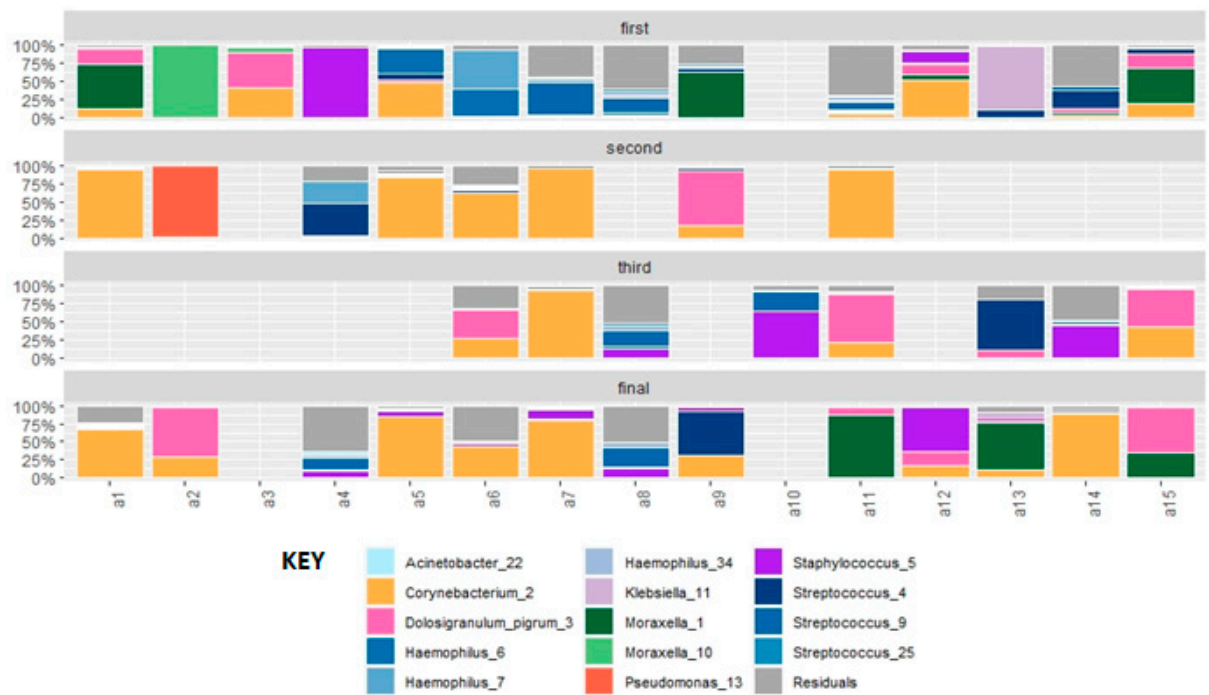

The microbial composition of the top 15 most abundant taxa in the nasopharyngeal swabs collected from children in the azithromycin group. Baseline swabs are denoted by “first”. The 3 subsequent swabs taken over the study period are presented underneath in columns for each participant. Blank cells are present as some swabs were unable to be collected during the COVID-19 pandemic and 1 baseline swab that did not pass the quality control for 16s rRNA analysis. The naming system of the amplicon sequence variants (ASVs) indicates firstly the genus or species if identified. The numerical value following the taxonomy level reports how abundant that particular genus/species was across all the study samples.

**Table S5.** Differential abundance testing between active and comparison groups at baseline, second and final sets of swabs

| ASV                                   | Logarithm of fold change | Adjusted p value |
|---------------------------------------|--------------------------|------------------|
| <i>Moraxella_lincolnii</i> _19        | -8.412139                | 0.001            |
| <i>Stenotrophomonas</i> _47           | -7.294903                | <0.001           |
| <i>Moraxella</i> _52                  | -6.850686                | <0.001           |
| <i>Massilia</i> _144                  | 8.523                    | <0.001           |
| <i>Haemophilus</i> _8                 | 9.105                    | <0.001           |
| <i>Moraxella</i> _23                  | 11.946                   | 0.001            |
| <b>A) Baseline swab</b>               |                          |                  |
| ASV                                   | Logarithm of fold change | Adjusted p value |
| <i>Enterococcus</i> _30               | -13.078                  | 0.013            |
| <i>Corynebacterium</i> _33            | -12.262                  | 0.013            |
| <i>Moraxella</i> _12                  | -9.794                   | 0.013            |
| <i>Haemophilus</i> _56                | -8.603                   | 0.023            |
| <i>Acinetobacter</i> _44              | 1.354                    | 0.087            |
| <b>B) Swabs collected at 4-months</b> |                          |                  |
| ASV                                   | Logarithm of fold change | Adjusted p value |
| <i>Moraxella</i> _1                   | -5.149                   | 0.001            |
| <i>Dolosigranulum_pigrum</i> _3       | -3.594                   | 0.004            |
| <i>Haemophilus</i> _7                 | -2.839                   | 0.001            |
| <i>Actinobacillus</i> _141            | 7.227                    | 0.001            |
| <i>Corynebacterium</i> _21            | 7.463                    | 0.005            |
| <i>Porphyromonas</i> _121             | 9.407                    | <0.001           |
| <i>Corynebacterium</i> _18            | 12.639                   | <0.001           |
| <b>C) Final set of swabs</b>          |                          |                  |

**Key**

-  Lower abundance taxa in the azithromycin group compared to the comparison group
-  Higher abundance taxa in the azithromycin group compared to the comparison group

**Table S6.** Antibiotics used for susceptibility testing using a disc diffusion method for specified bacteria. European committee on Antimicrobial Susceptibility Testing (EUCAST) zone diameter breakpoints used.

| Bacteria | Antibiotic (µg on disc) | Zone diameter break points (mm) [27] |             |
|----------|-------------------------|--------------------------------------|-------------|
|          |                         | Sensitive ≥                          | Resistant < |

|                      |                    |    |    |
|----------------------|--------------------|----|----|
| <i>S. pneumoniae</i> | Erythromycin 15    | 22 | 19 |
|                      | Oxacillin 1        | 20 | 20 |
|                      | Tetracycline 30    | 25 | 22 |
|                      | Chloramphenicol 30 | 21 | 21 |
|                      | Levofloxacin 5     | 50 | 16 |
| <i>H. influenzae</i> | Chloramphenicol 30 | 28 | 28 |
|                      | Ampicillin 2       | 18 | 18 |
|                      | Cefuroxime 30      | 27 | 25 |
|                      | Ciprofloxacin 5    | 30 | 30 |
|                      | tetracycline 30    | 25 | 22 |
|                      | Co-amoxiclav 3     | 50 | 15 |

**Table S7.** European Committee on Antimicrobial Susceptibility Testing (EUCAST) MIC cut offs for azithromycin susceptibility. MICs were measured using an agar-gradient diffusion method (the E-test) for specified bacteria

| Bacteria             | MIC breakpoint used (mg/L) [27] |               |
|----------------------|---------------------------------|---------------|
|                      | Sensitive $\leq$                | Resistant $>$ |
| <i>S pneumoniae</i>  | 0.25                            | 0.25          |
| <i>H. influenzae</i> | 4                               | 4             |
| <i>M catarrhalis</i> | 0.25                            | 0.25          |
| <i>S. aureus</i>     | 2                               | 2             |
